# Supplementary material for: Development of Hydroxamic Acid Compounds for Inhibition of Metallo-β-Lactamase from Bacillus anthracis
Source: MDPI journal article supplement (doi:10.3390/ijms23169163), 2022-08-15
Supplement: s1 [file s1]

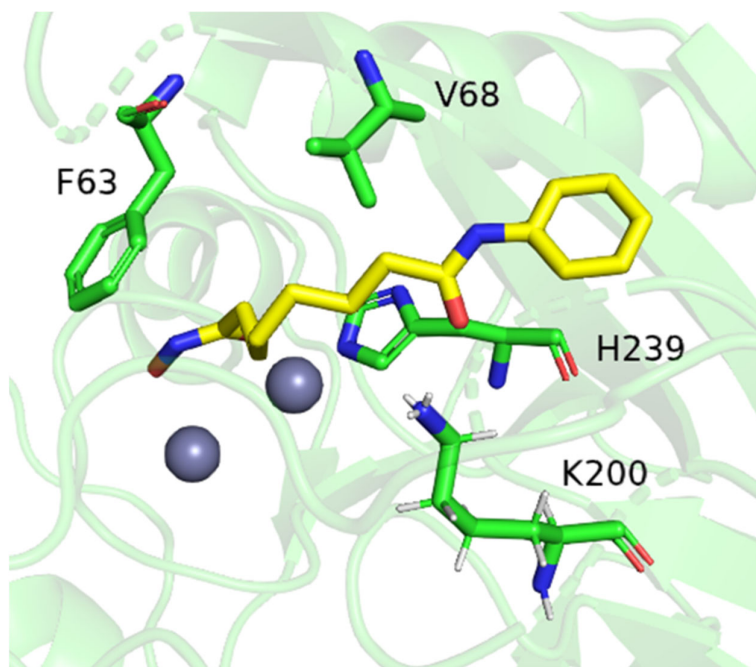

**Figure S1.** Average atomic coordinates of the root mean square fluctuation of SAHA. .

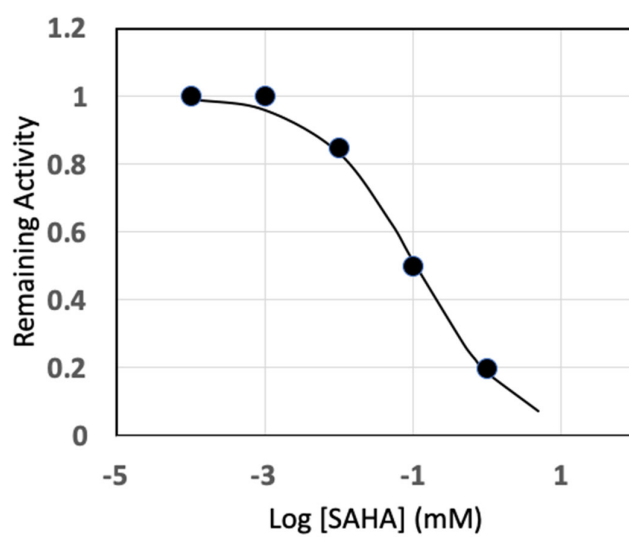

**Figure S2.** The inhibition of Bla2 by SAHA.

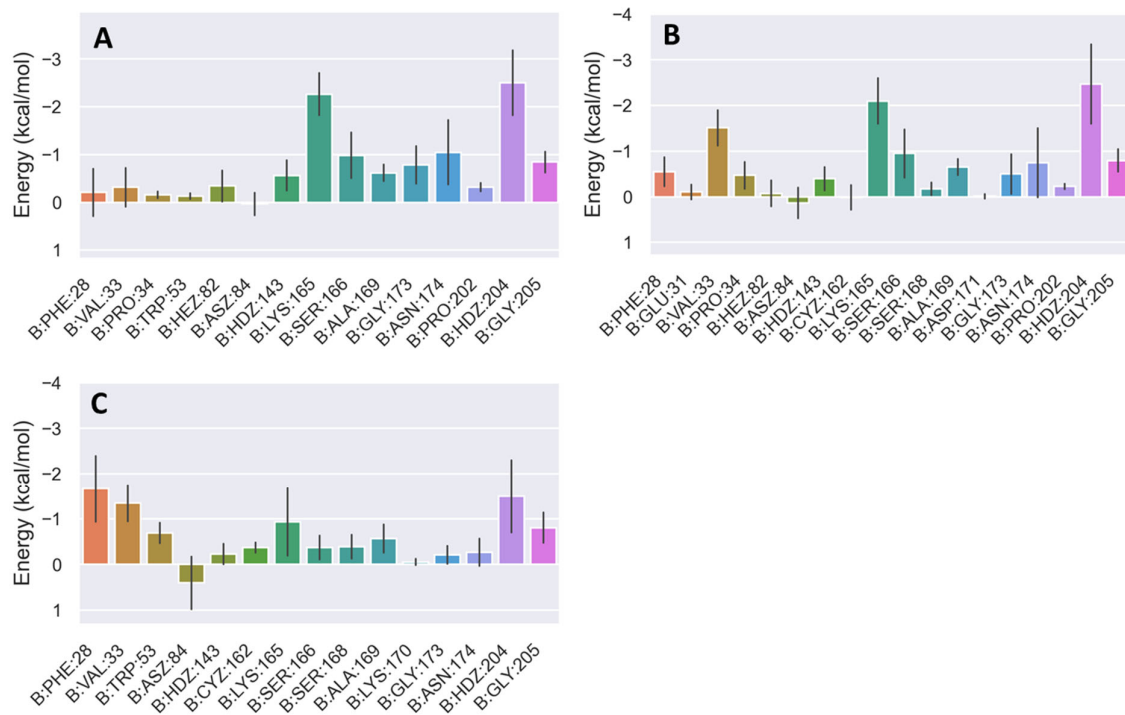

**Figure S3.** Per-Residue Decomposition figures of the (A) Compound 4 simulation, (B) Compound 6 simulation, and (C) SAHA simulation. Residue sequence numbering is shortened by 35, in relation to residue references in the rest of the paper.

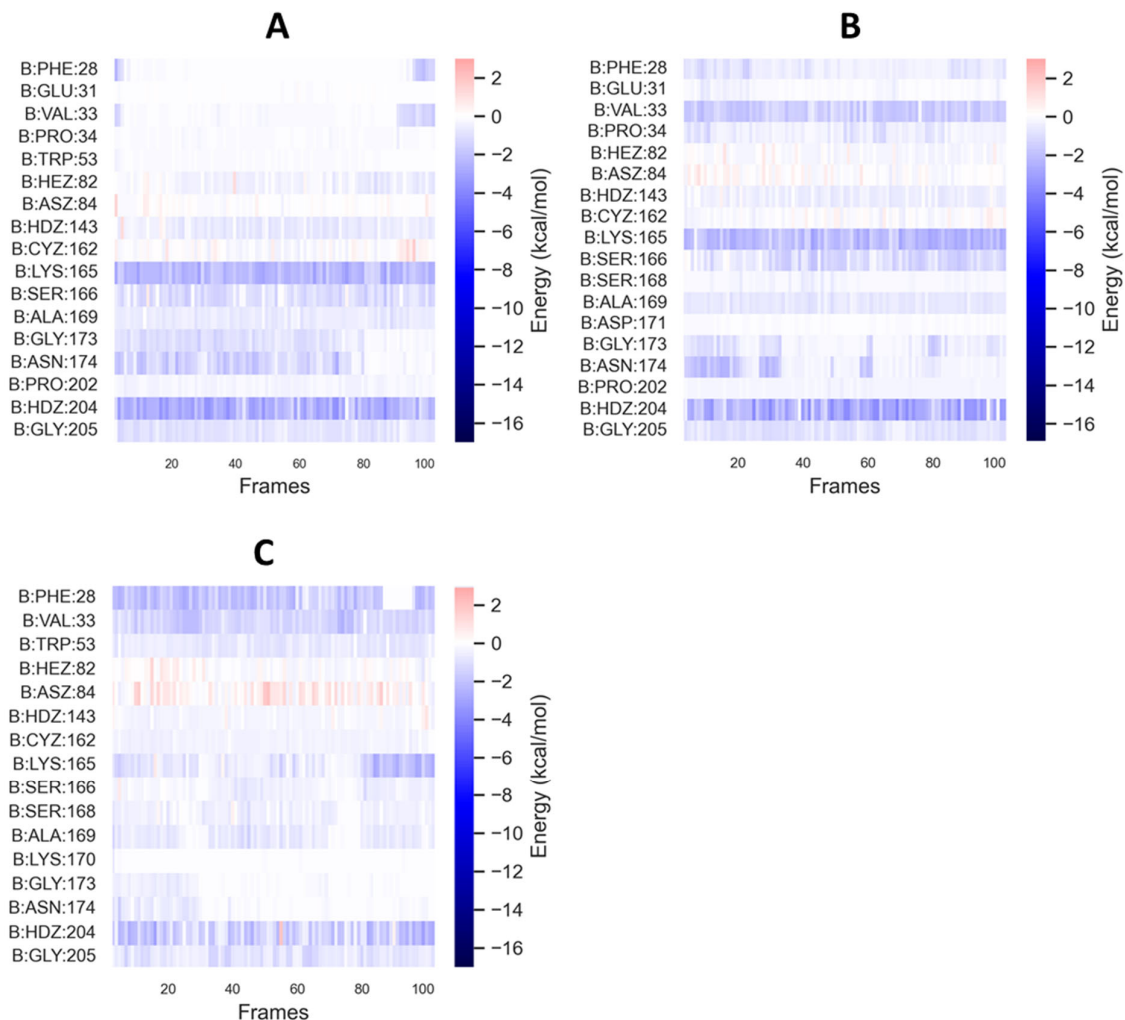

**Figure S4.** Per-Residue Decomposition Heatmap of (A) Compound 4 simulation free energy, (B) Compound 6 simulation free energy, and (C) SAHA simulation free energy. Residue sequence numbering is shortened by 35, in relation to residue references in the rest of the paper.

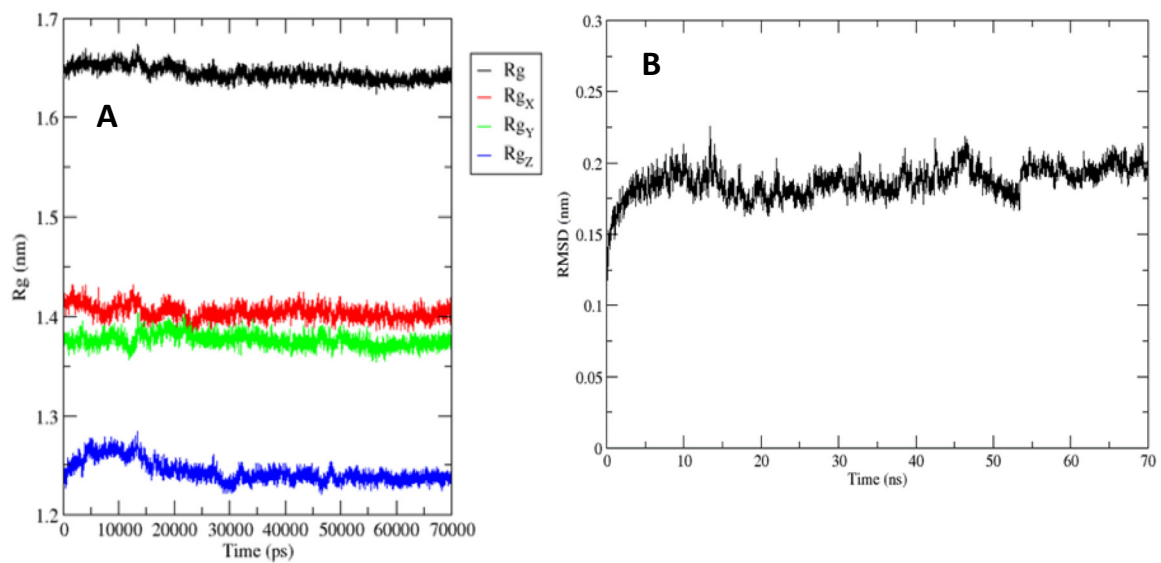

**Figure S5.** (A) The radius of gyration of the protein backbone in the 70 ns simulation. (B) The RMSD of the protein backbone in the 70 ns simulation.
